# Supplementary material
Source: Springer Nature journal article supplement (https://www.springermedizin.de/resource/supplementary/12958_2008_417_MOESM4_ESM.pdf/9567834)

**A.**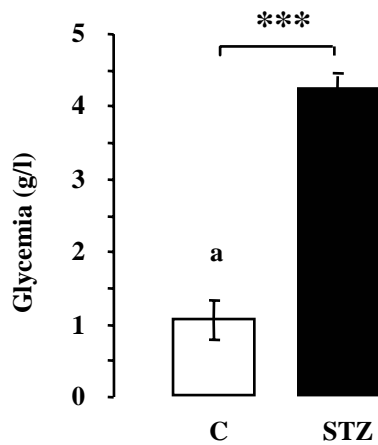**B.**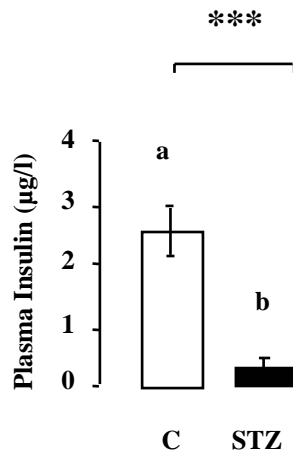**C.**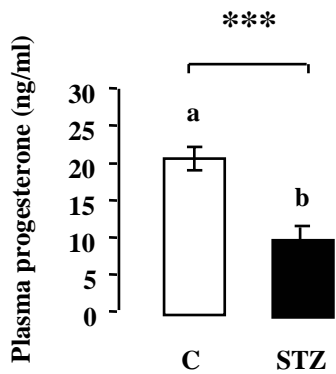**D.**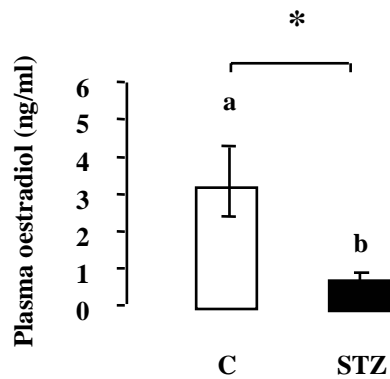

Supplement: MOESM4 [file 9567834]
